# Supplementary material
Source: MDPI journal article supplement (https://www.mdpi.com/2073-4344/10/5/551)
Supplement: s1 [file s1]

# Supporting Information: In-Depth Structural and Optical Analysis of Ce-modified ZnO Nanopowders with Enhanced Photocatalytic Activity Prepared by Microwave Assisted Hydrothermal Method

Otman Bazta, Ana Urbieto, Susana Trasobares, Javier Piqueras, Paloma Fernández, Mohammed Addou, Jose Juan Calvino and Ana Belén Hungría

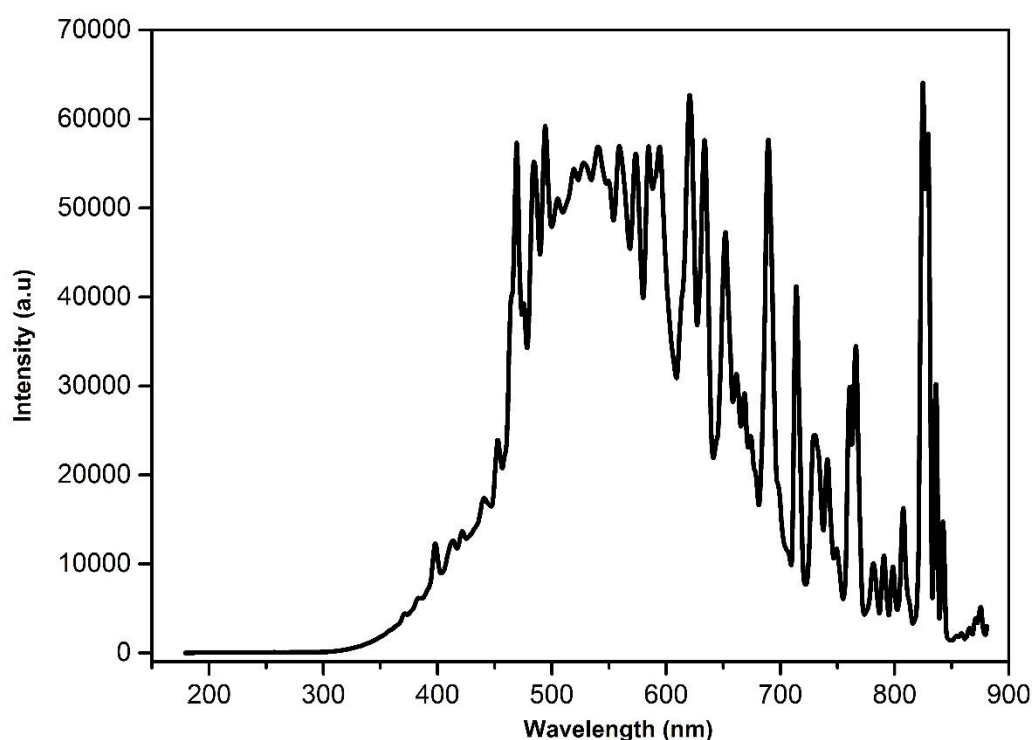

**Figure S1.** Emission spectrum of Xenon lamp utilized within the present study.

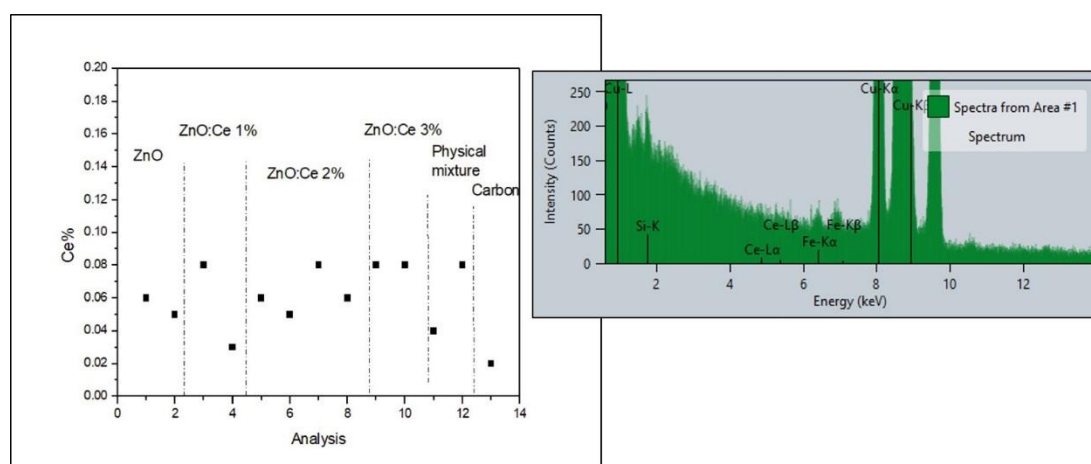

**Figure S2.** (a) The graph shows the atomic percentages of cerium present in apparently cerium-free zones of samples ZnO, ZnO: Ce1%, ZnO: Ce2%, ZnO: Ce3%, and a sample prepared as a reference

consisting in a physical mixture of  $\text{CeO}_2$  and  $\text{ZnO}$  (with 2% atomic loading of cerium). An analysis performed in a holey carbon area of the grids free of sample is also considered. All loads, including those acquired in an unmodified  $\text{ZnO}$  sample, are less than 0.1%. As can be seen in the expanded spectrum shown in image (b), acquired in an area of the  $\text{ZnO}:\text{Ce}$  2% sample, which shows an atomic cerium content of 0.06%, there is only noise at the position at which the cerium peaks should appear.

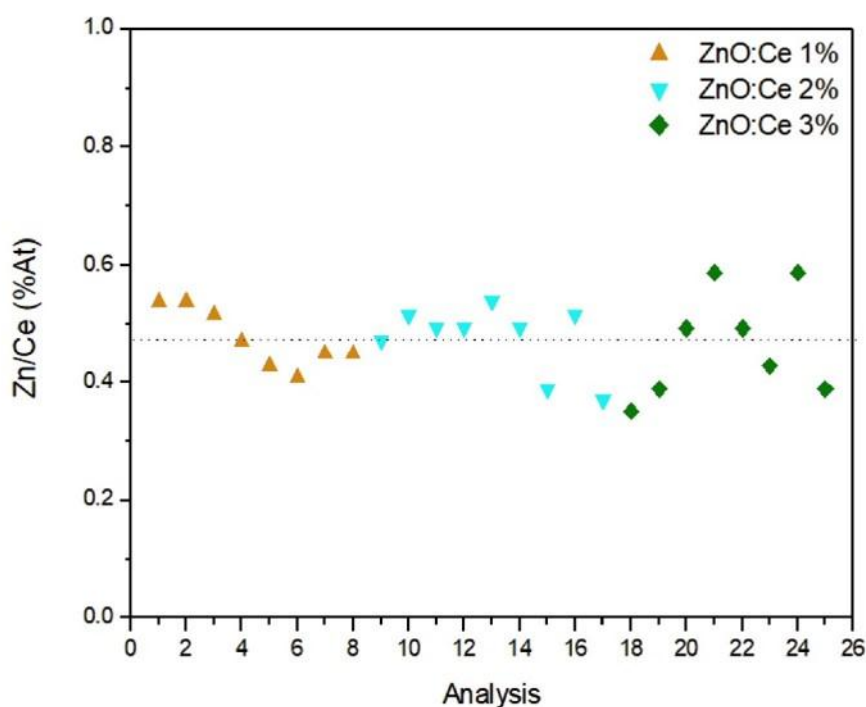

**Figure S3** The graph shows 25 analyses of the atomic Zn/Ce ratio in cerium-rich areas of the three samples modified with different amounts of cerium. The dotted line corresponds to the mean value of 0.47, which corresponds to a composition of the mixed oxide  $\text{Ce}_{0.68}\text{Zn}_{0.32}\text{O}_x$ .

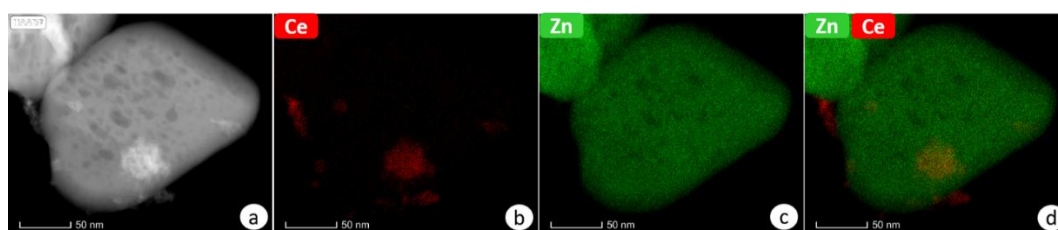

**Figure S4.** Sample  $\text{ZnO}-\text{Ce}$  1% (a) HAADF-STEM image, XEDS elemental maps showing the spatial distribution of (b) Ce, (c) Zn and (d) both elements together corresponding to the area displayed in (a)

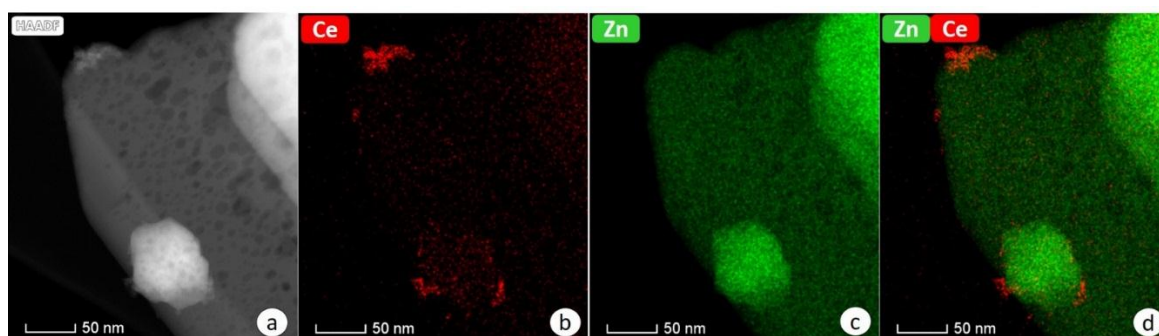

**Figure S5.** Sample ZnO-Ce 2% (a) HAADF-STEM image, XEDS elemental maps showing the spatial distribution of (b) Ce, (c) Zn and (d) both elements together corresponding to the area displayed in (a)

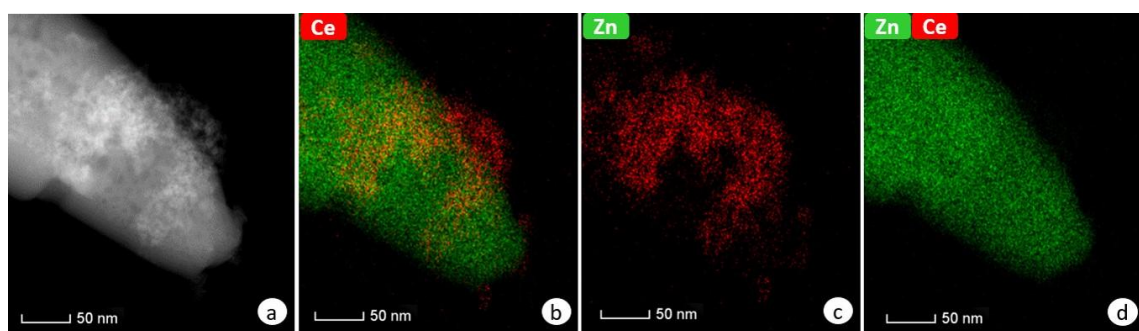

**Figure S6.** Sample ZnO-Ce 3% (a) HAADF-STEM image, XEDS elemental maps showing the spatial distribution of (b) Ce, (c) Zn and (d) both elements together corresponding to the area displayed in (a)

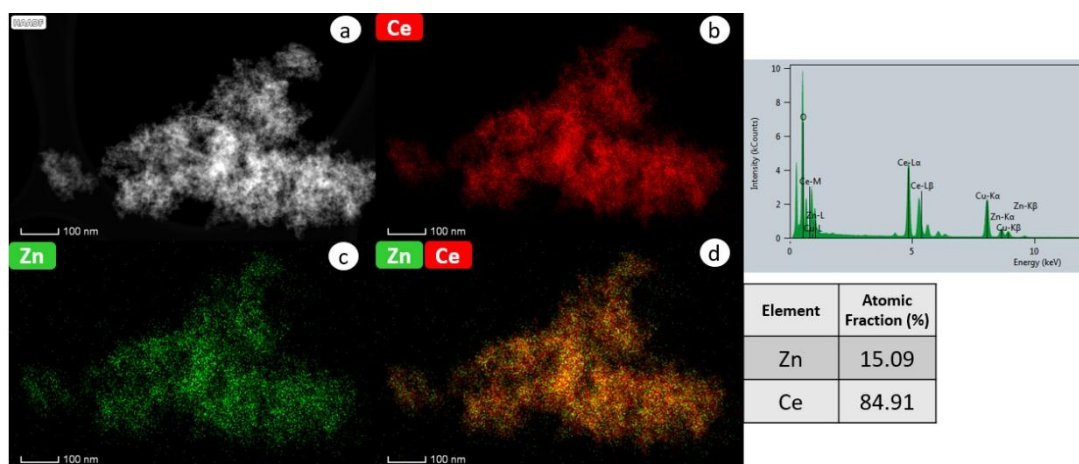

**Figure S7.** STEM -HAADF images of the sample at low magnification showing the major polycrystalline aggregates together with ZnO nanoflakes.

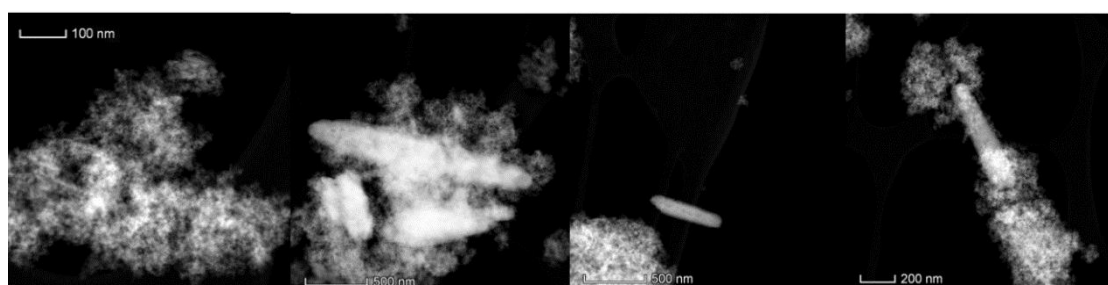

**Figure S8.** Sample ZnO-Ce<sub>0.68</sub>Zn<sub>0.32</sub>O<sub>x</sub> XEDS elemental maps showing the spatial distribution of (b) Ce, (c) Zn and (d) both elements together corresponding to the area displayed in (a).

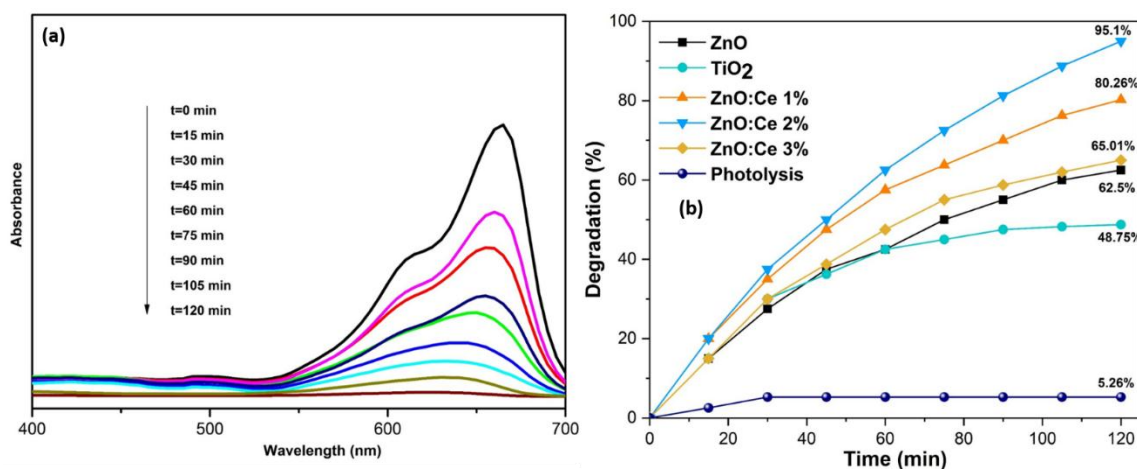

**Figure S9.** (a) Absorbance spectra of MB aqueous solution in the presence of ZnO: Ce 2% photocatalyst at increasing irradiation times. (b) photodegradation vs irradiation time of different samples.

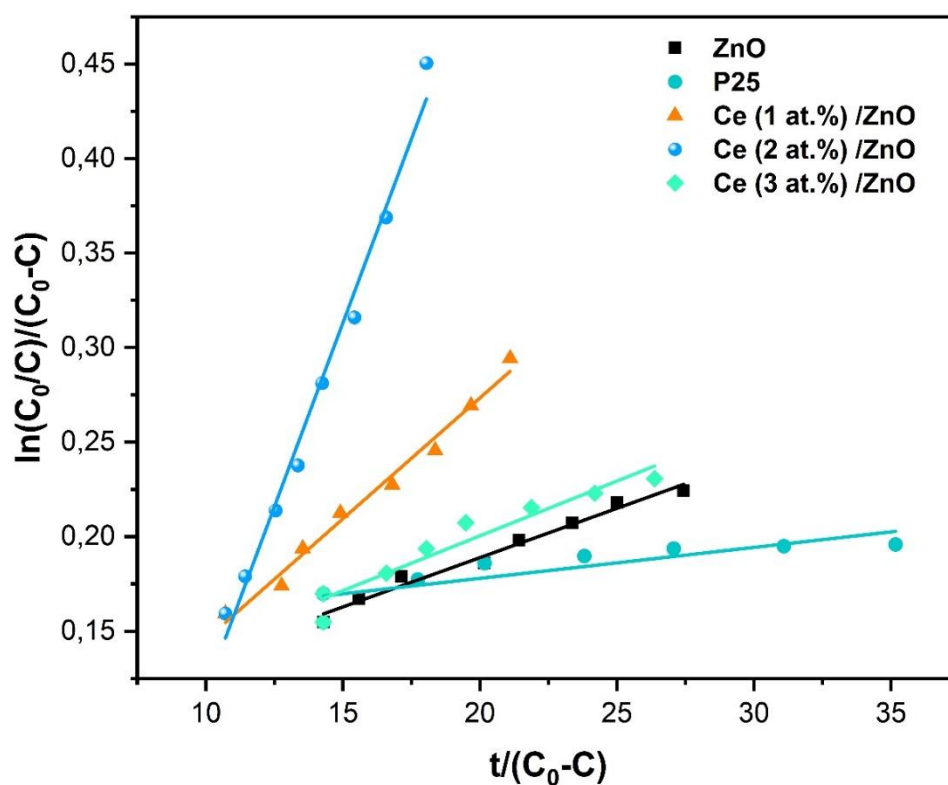

**Figure S10.** L-H plots of MB degradation by Ce/ZnO and P25 photocatalysts.
